# Supplementary material for: Soil Metaproteomics as a Tool for Environmental Monitoring of Minelands
Source: MDPI journal article supplement (doi:10.3390/f12091158), 2021-08-26
Supplement: s1 [file s1]

## PROTEOMIC PROTOCOL

### *Protein extraction*

Protein isolation was performed according to Wang et al. [20], with some modifications. From each composite sample, 3 g of soil were added to 9.0 mL of extraction buffer [0.85 M sucrose, 0.1 M Tris-HCl (pH 8.0), 2% (w/v) sodium dodecyl sulfate (SDS), 1 mM phenylmethylsulfonyl fluoride and 2% (w/v) polyvinylpyrrolidone]. After that, 3 mM Protease Inhibitor Cocktail Powder (Sigma-Aldrich) and 70 mM dithiothreitol (DTT) were added. Samples were incubated at room temperature per 10 min before performing five events of sonication (30 s duration per event and 30 s intervals between them). Each sample was fractioned in eight microtubes and homogenized individually with 700  $\mu$ L saturated phenol (pH 8.0). After centrifugation at 14,000 rpm per 7 min at 4 °C, the phenolic phase of each aliquot was collected and combined into new microtubes, following by other centrifugation at 14,000 rpm per 7 min at 4 °C to remove any residue of SDS or the aqueous phase. The phenolic phase was collected and proteins were precipitated by incubating the samples with 800  $\mu$ L 0.1 M ammonium acetate (prepared in absolute methanol at -20 °C) at -80 °C overnight. Samples were centrifuged at 14,000 rpm per 4 min at 4 °C and the supernatant was carefully discarded. The remaining protein pellet was washed two times with 1.5 mL 80% (v/v) ice-cold acetone and ice-cold ethanol. Finally, the resulting pellet was dried in a vacuum concentrator for 7 min and proteins were solubilized by adding 50  $\mu$ L of 0.2 % RapiGest™ Surfactant (Waters) and stored at -80 °C until protein digestion. We used Qubit 2.0 Fluorometer (Invitrogen) to estimate protein concentration.

### *Protein digestion and sample desalting*

Thirty micrograms of protein were quantified per sample, ammonium bicarbonate (50 mM) was added to obtain a final volume of 100  $\mu$ L and to dilute RapiGest™ Surfactant to 0.1%. The preparation for digestion involved protein reduction with dithiothreitol (DTT, 5 mM) and incubation for 25 minutes at 56 °C, followed by alkylation with iodoacetamide (IAA, 14 mM) for 30 minutes at room temperature. Residual IAA was removed by adding DTT (5 mM) and incubating for 15 minutes at room temperature, followed by the addition of CaCl<sub>2</sub> (1 mM) and treatment with trypsin (20 ng/ $\mu$ L) for 20 hours at 37 °C. Subsequently, trifluoroacetic acid (TFA) was added to a final concentration of 0.4% to terminate the enzymatic reaction. Samples were incubated for 90 minutes at 37 °C, then centrifuged at 14,000 rpm at 6 °C for 30 minutes. Finally, the supernatant was transferred to appropriated vials and the pH solution was adjusted to 10 with 1 N ammonium hydroxide for effective trapping on the first-dimension column of the Ultra-Performance Liquid Chromatography (UPLC).

BACTERIA POPULATIONS

A)

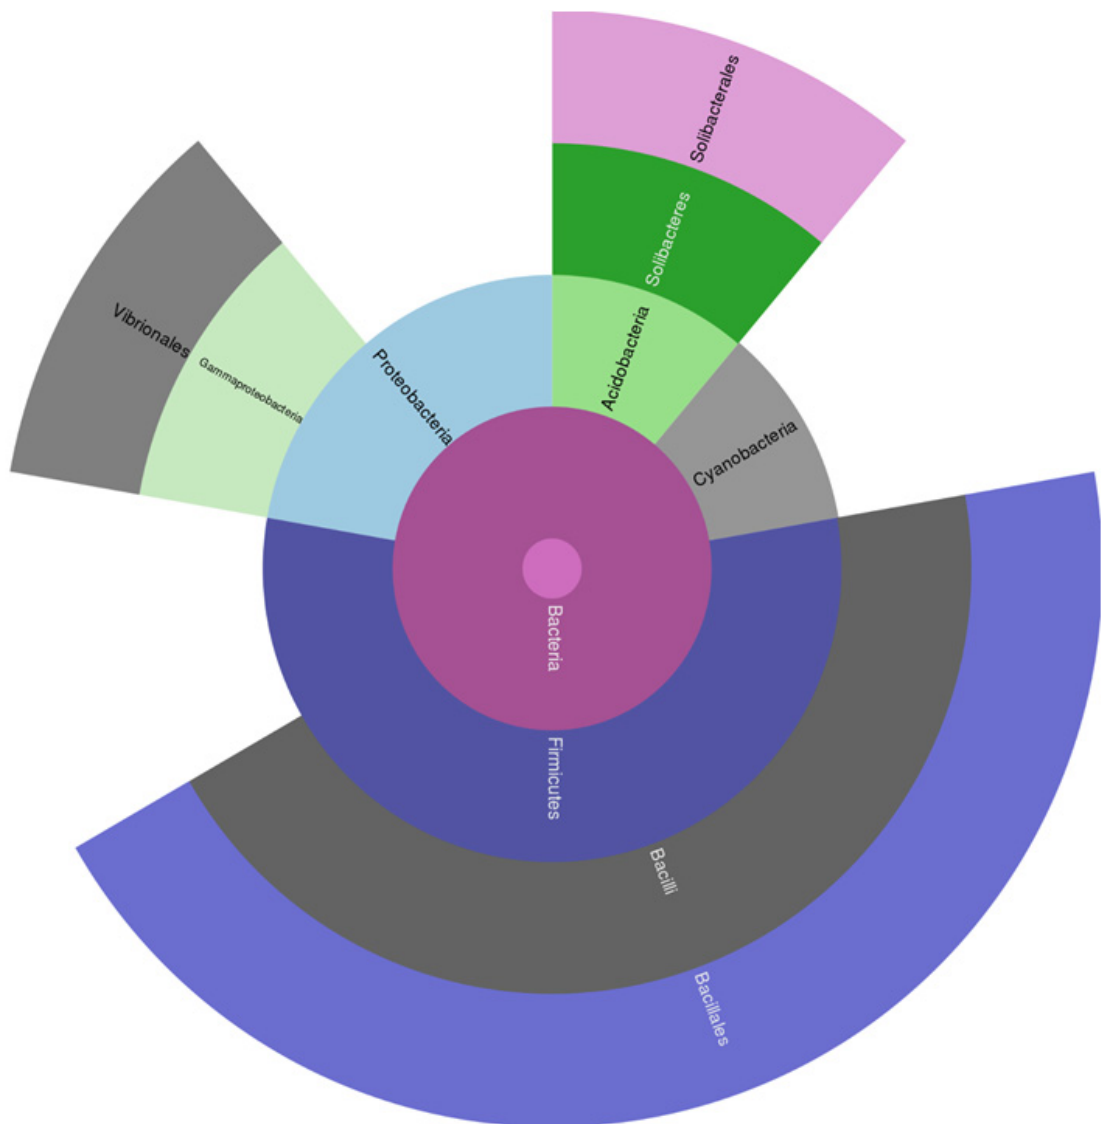

**B)**

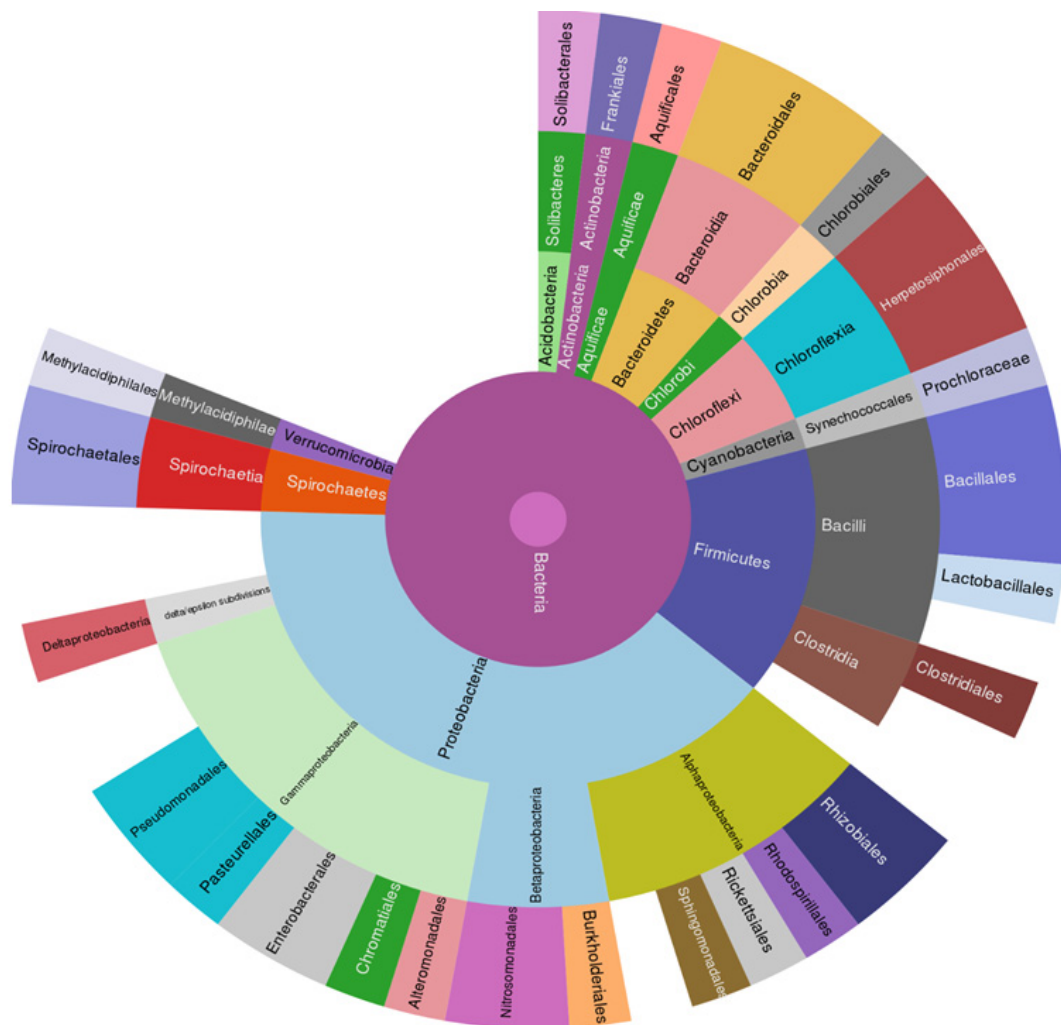

C)

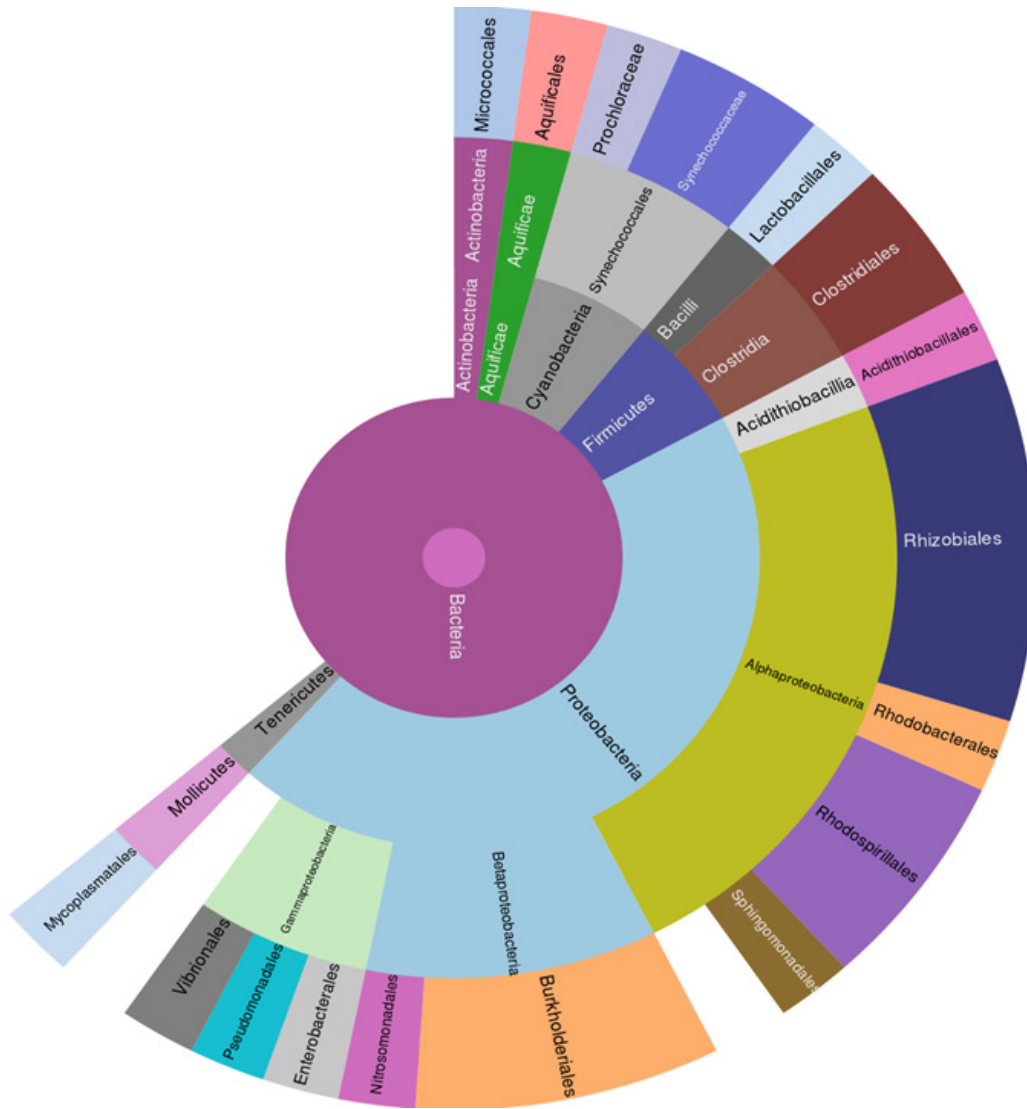

D)

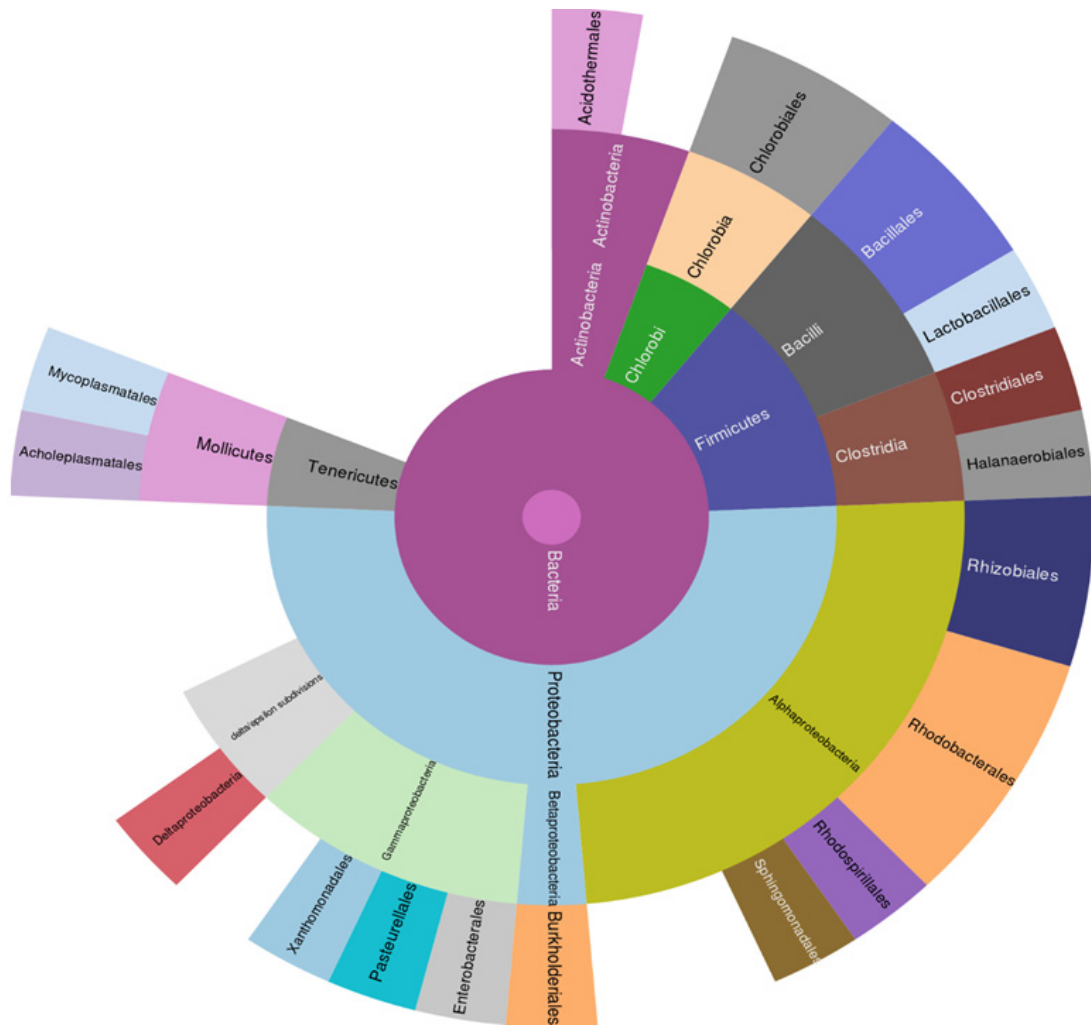

**E)**

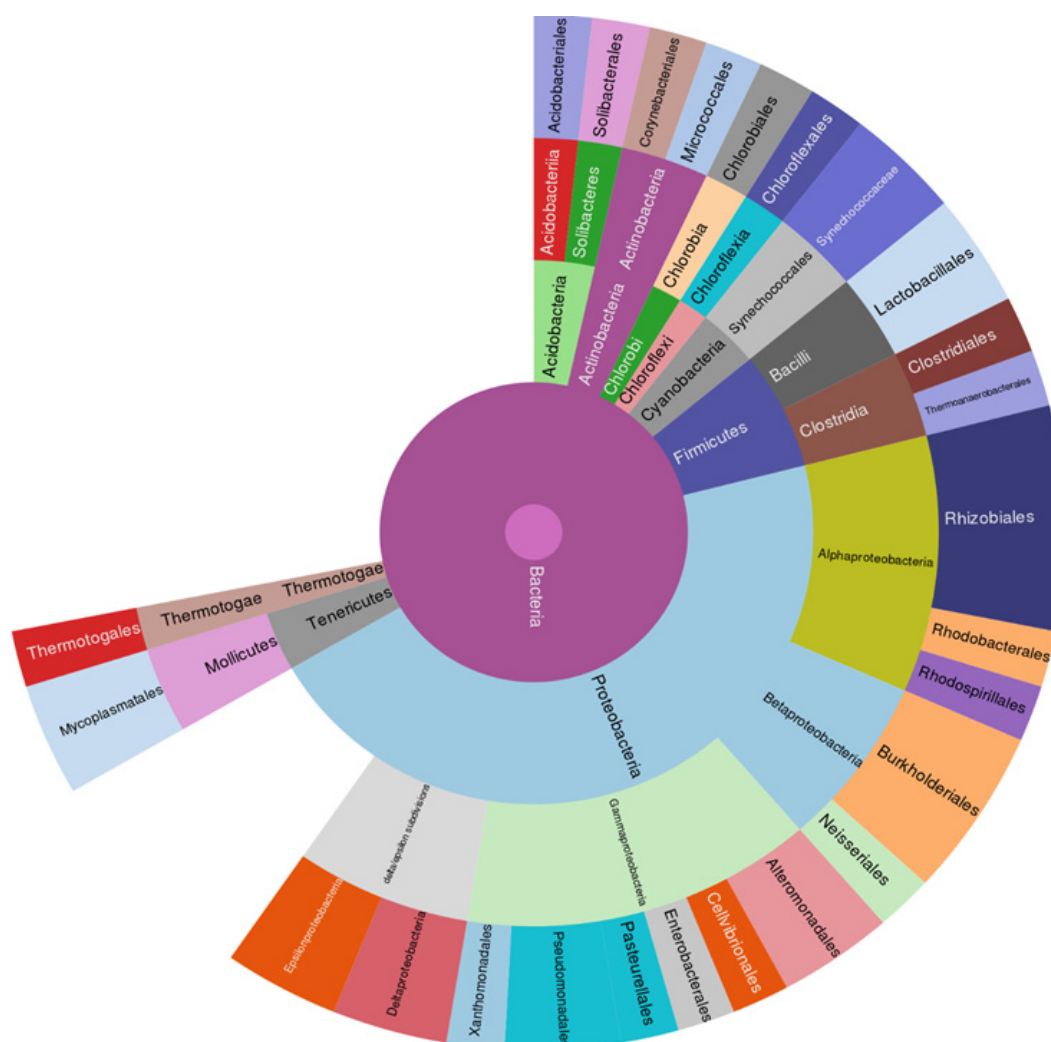

**Figure S5.** Peptide abundance in the phyla, classes, and order of bacteria (respectively, from the central circle of "bacteria"), built by UniPept 4.0 software. The size of the slices corresponds to the number of peptides identified in the respective taxonomic level. **A)** Nonrehabilitated stage, **B)** Early rehabilitation (4 years), **C)** Advanced rehabilitation (12 years), **D)** Advanced rehabilitation (14 years), **E)** Native soil (reference).
